# Supplementary material
Source: PubMed Central journal article supplement (PMC9977936)
Supplement: mmc1.pdf [file mmc1.pdf]

Supplementary file

Case-fatality rates and risk of death from COVID-19 and influenza A/H3N2 in Brazil: a nationwide ecological study

Paulo Ricardo Martins-Filho, Jerocílio Maciel de Oliveira Júnior, Cliomar Alves dos Santos

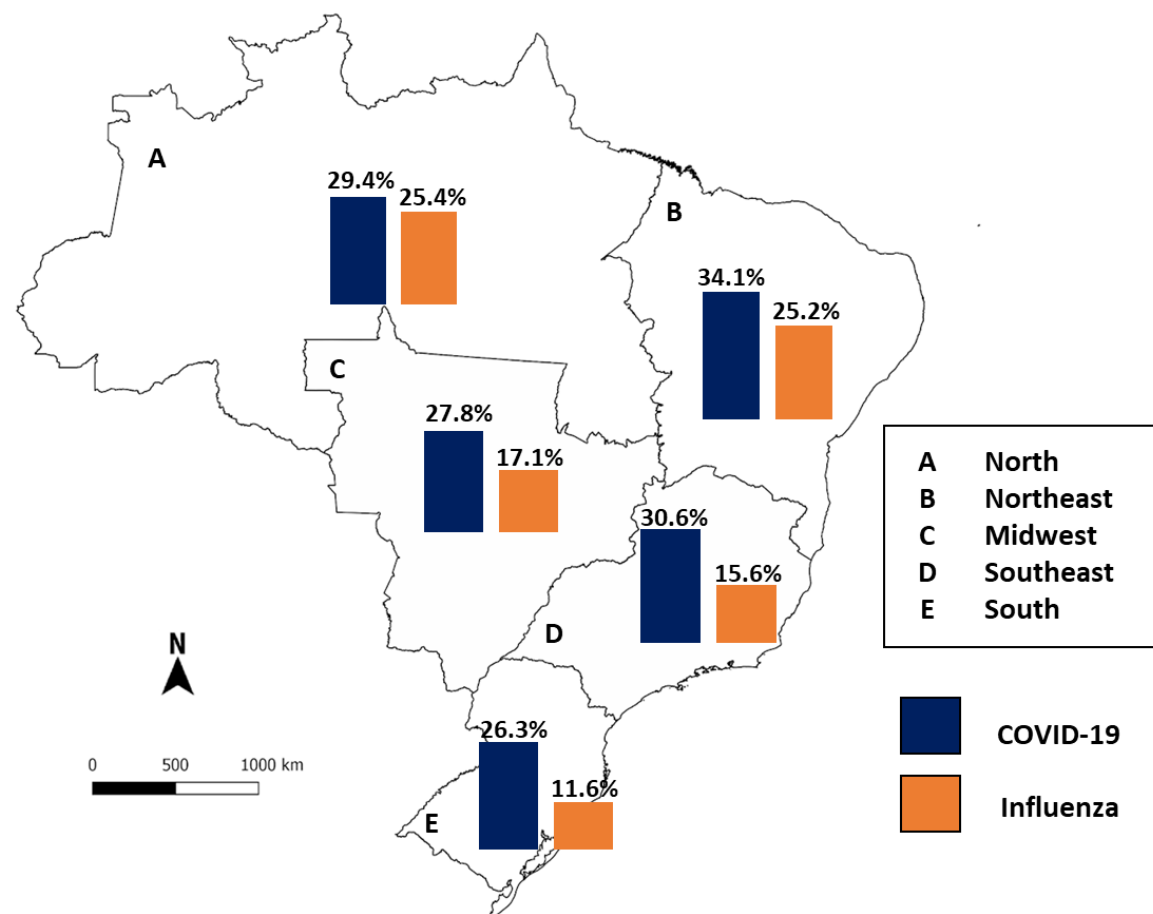

Figure 1. Case-fatality rates from COVID-19 and influenza A/H3N2 according to the geographic regions in Brazil.

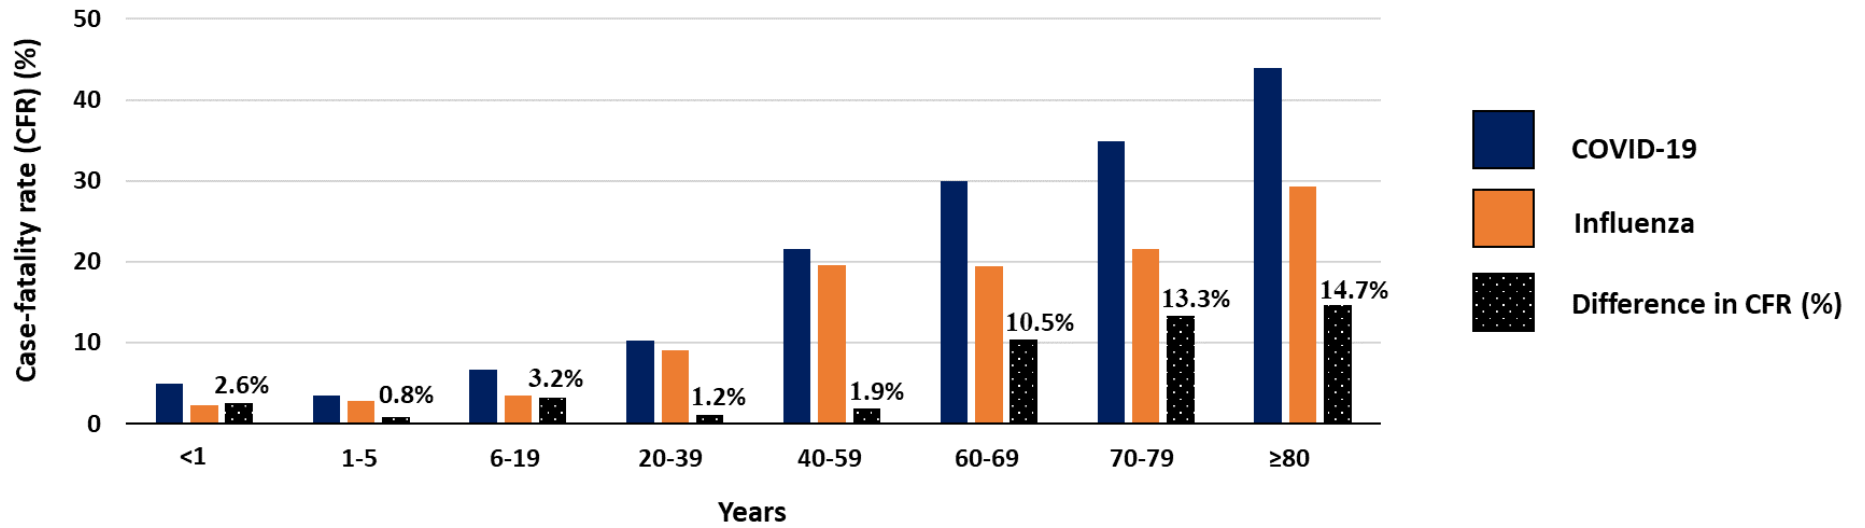

Figure 2. Differences in case-fatality rates between COVID-19 and influenza A/H3N2 according to age.
